# Supplementary material for: 3D interaction homology: Hydropathic interaction environments of serine and cysteine are strikingly different and their roles adapt in membrane proteins
Source: PubMed Central journal article supplement — Curr Res Struct Biol. 2021 Oct 1;3:239–56. doi: 10.1016/j.crstbi.2021.09.002 (PMC8517007; doi:10.1016/j.crstbi.2021.09.002), 2021-10-01
Supplement: mmc11.pdf [file mmc11.pdf]

## SUPPORTING INFORMATION

### **3D interaction homology: Hydrophobic interaction environments of serine and cysteine are strikingly different and their roles adapt in membrane proteins.**

Claudio Catalano<sup>1,2</sup>, Mohammed H. AL Mughram<sup>1,2</sup>, Youzhong Guo<sup>1,2</sup> and Glen E. Kellogg<sup>1,2,3\*</sup>

<sup>1</sup>Department of Medicinal Chemistry, Virginia Commonwealth University, Richmond, Virginia, USA;

Institute for Structural Biology, Drug Discovery and Development, Virginia Commonwealth University, Richmond, Virginia, USA;

<sup>3</sup>Center for the Study of Biological Complexity, Virginia Commonwealth University, Richmond, Virginia, USA

\* Corresponding Author (email: [glen.kellogg@vcu.edu](mailto:glen.kellogg@vcu.edu))

In this document:

**Figure S1: Hydrophobic interaction maps illustrating the Gaussian-weighted average clustered SER sidechain environments for the *c5* chess square.**

**Figure S2: Hydrophobic interaction maps illustrating the Gaussian-weighted average clustered SER sidechain environments for the *d5* chess square.**

**Figure S3: Hydrophobic interaction maps illustrating the Gaussian-weighted average clustered SER sidechain environments for the *f6* chess square.**

**Figure S4: Hydrophobic interaction maps illustrating the Gaussian-weighted average clustered CYS sidechain environments for the *c5* chess square.**

**Figure S5: Hydrophobic interaction maps illustrating the Gaussian-weighted average clustered CYS sidechain environments for the *c5* chess square.**

**Figure S6: Hydrophobic interaction maps illustrating the Gaussian-weighted average clustered CYS sidechain environments for the *c5* chess square.**

**Figure S7: Titration curves of CYZ (cysteine, broken bridge) residue by secondary structure.**

**Figure S8: Hydrophobic interaction maps illustrating the Gaussian-weighted average clustered CYX (cysteine, intact bridge) sidechain environments for the *b1.60* chess square/parse.**

**Figure S9: Hydrophobic interaction maps illustrating the Gaussian-weighted average clustered CYX (cysteine, intact bridge) sidechain environments for the *c5* chess square.**

**Figure S10: Hydrophobic interaction maps illustrating the Gaussian-weighted average clustered SER<sub>m</sub> (serine, membrane protein) sidechain environments for the *d5.300* chess square/parse.**

**Figure S11: Hydropathic interaction maps illustrating the Gaussian-weighted average clustered SERm (serine, membrane protein) sidechain environments for the *f6.300* chess square/parse.**

**Figure S12: Hydropathic interaction maps illustrating the Gaussian-weighted average clustered CYSm (cysteine, membrane protein) sidechain environments for the *d5.300* chess square/parse.**

**Figure S13: Hydropathic interaction maps illustrating the Gaussian-weighted average clustered CYSm (cysteine, membrane protein) sidechain environments for the *f6.300* chess square/parse.**

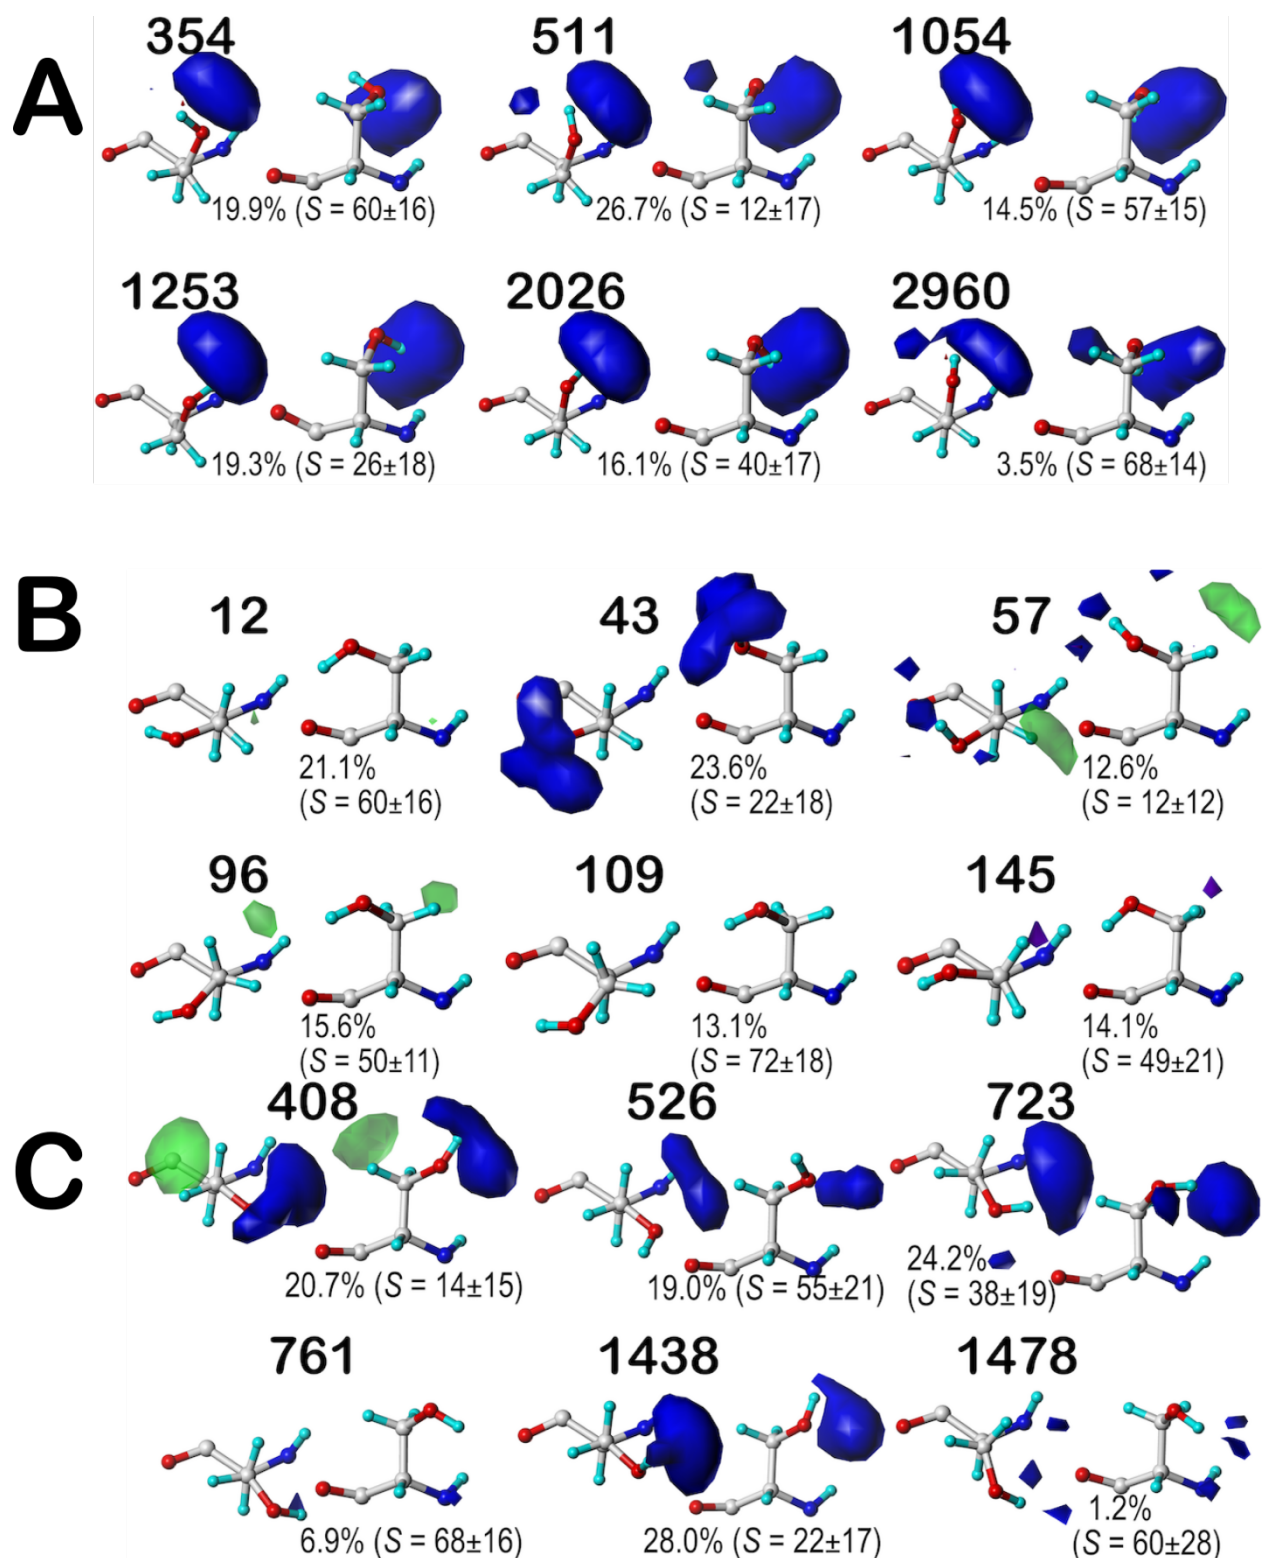

**Figure S1. Hydropathic interaction maps illustrating the Gaussian-weighted average clustered SER sidechain environments for the *c5* chess square. A) 60° parse; B) 180° parse; C) 300° parse.** Two views are shown for each map: left) the CA-CB z-axis points out of the page, right) the CA-CB axis points up. The x-axes of both views point right and the y-axis points up on the left and back on the right. The blue contours represent favorable polar interactions between the hydroxyl and neighboring residues; red contours are unfavorable polar interactions; green contours are favorable hydrophobic-hydrophobic interactions between the methylene and neighbors; purple contours are unfavorable hydrophobic-polar interactions. Translucent green contours, when present, are plotted at one-half the map density of the solid green contours.

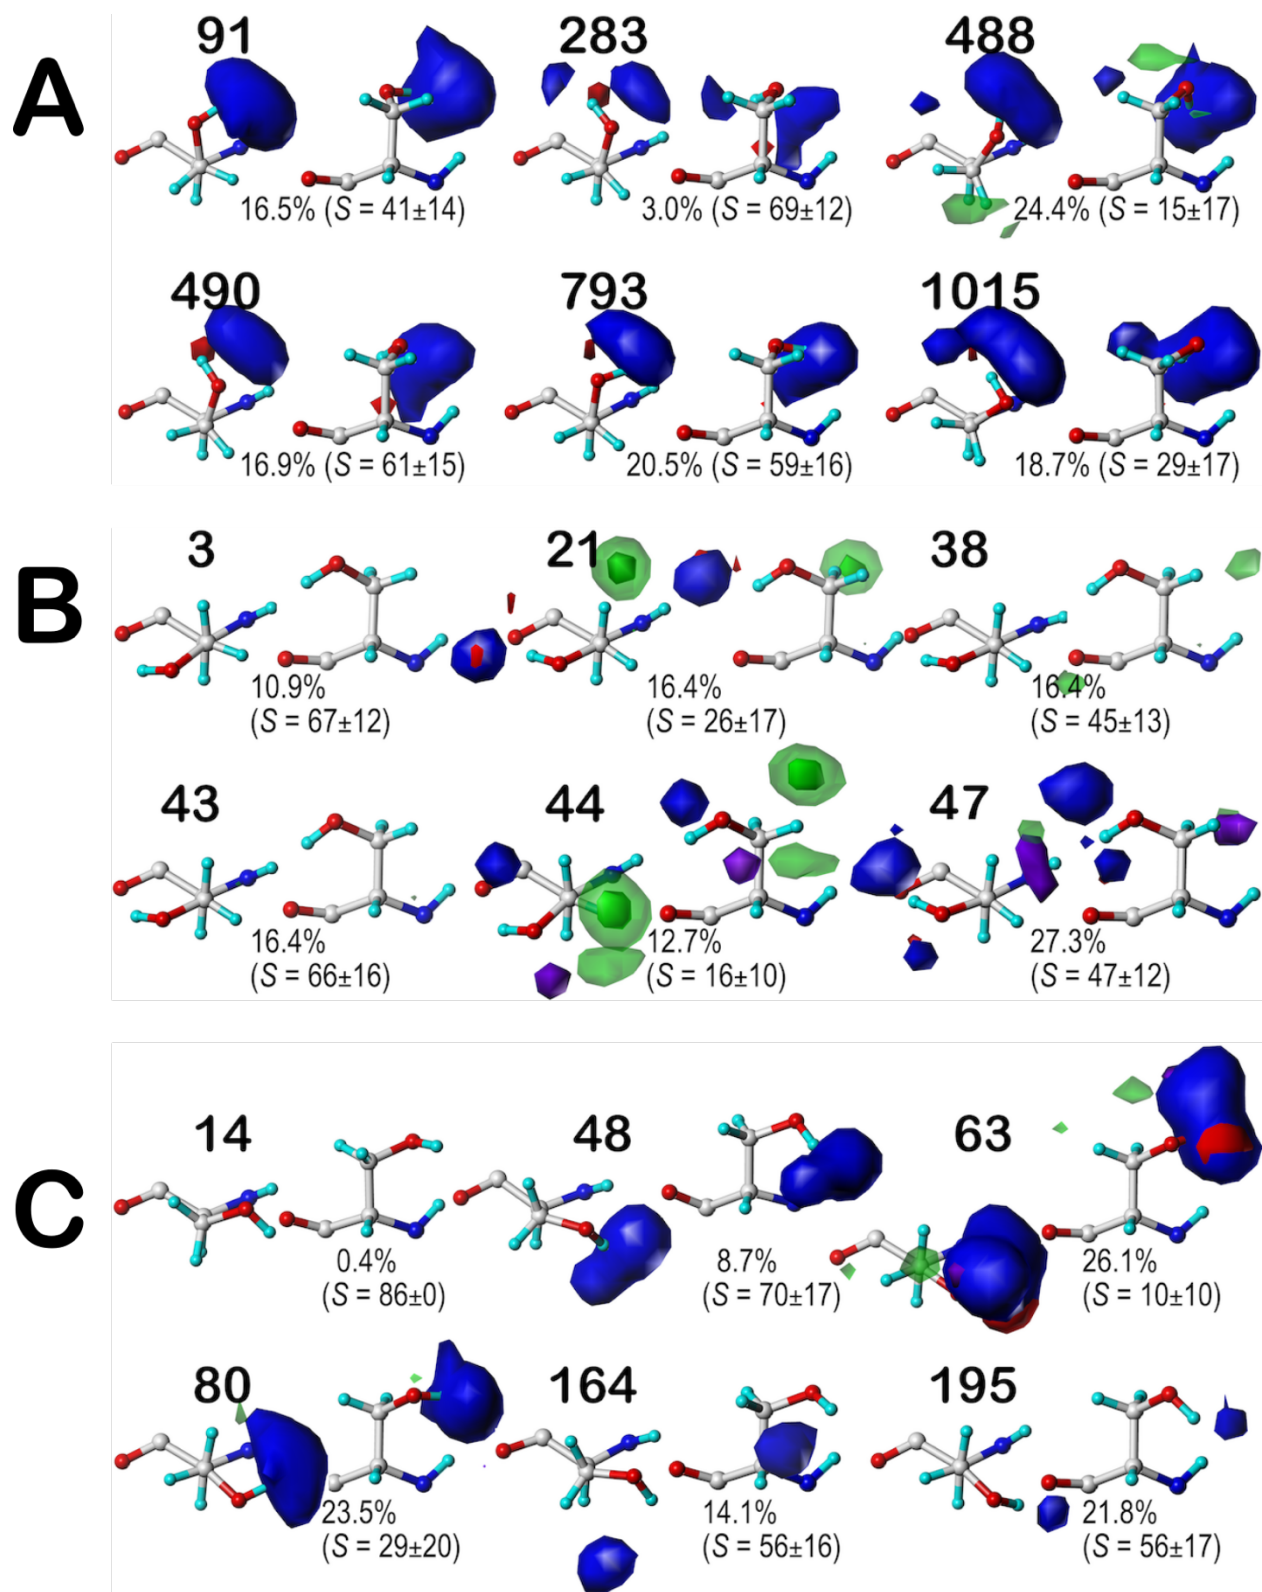

**Figure S2. Hydropathic interaction maps illustrating the Gaussian-weighted average clustered SER sidechain environments for the *d5* chess square. A) 60° parse; B) 180° parse; C) 300° parse. See caption for Figure S1.**

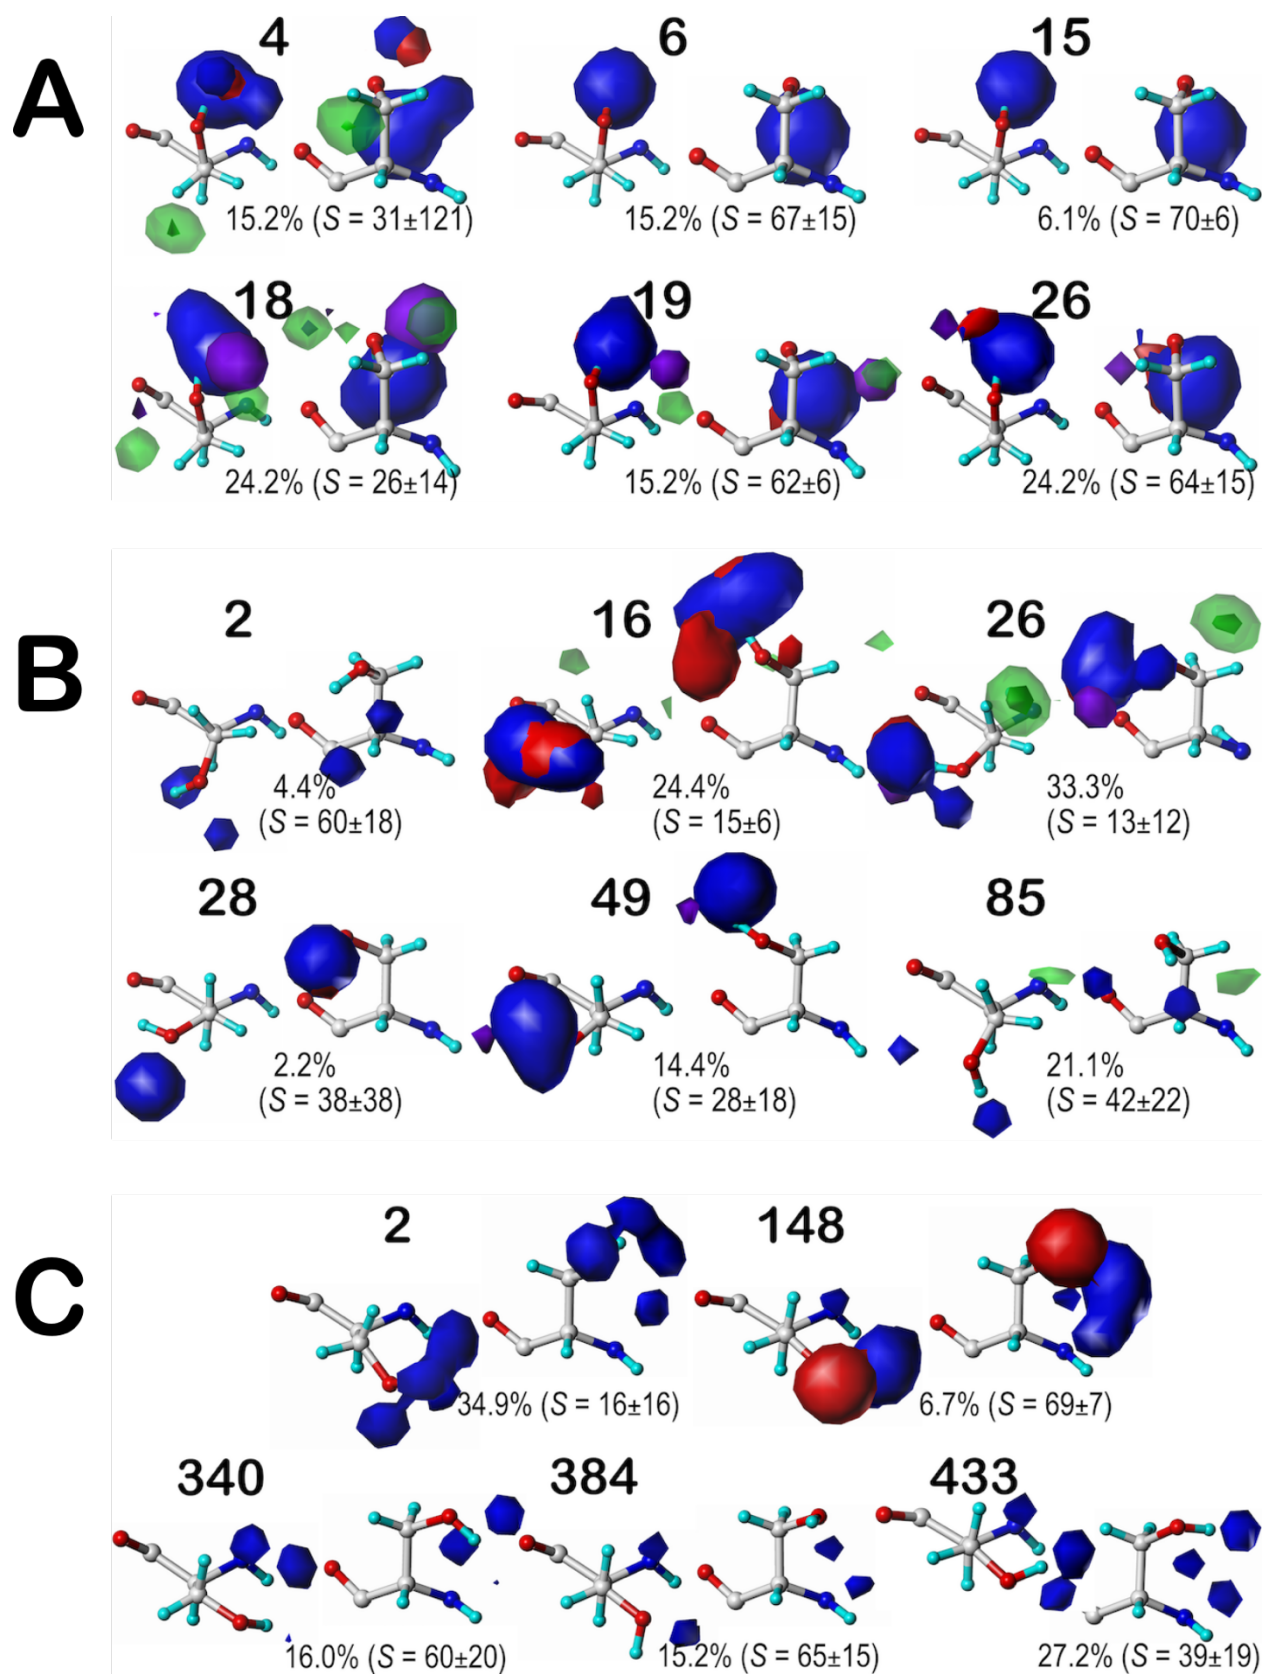

**Figure S3. Hydropathic interaction maps illustrating the Gaussian-weighted average clustered SER sidechain environments for the *f6* chess square. A) 60° parse; B) 180° parse; C) 300° parse. See caption for Figure S1.**

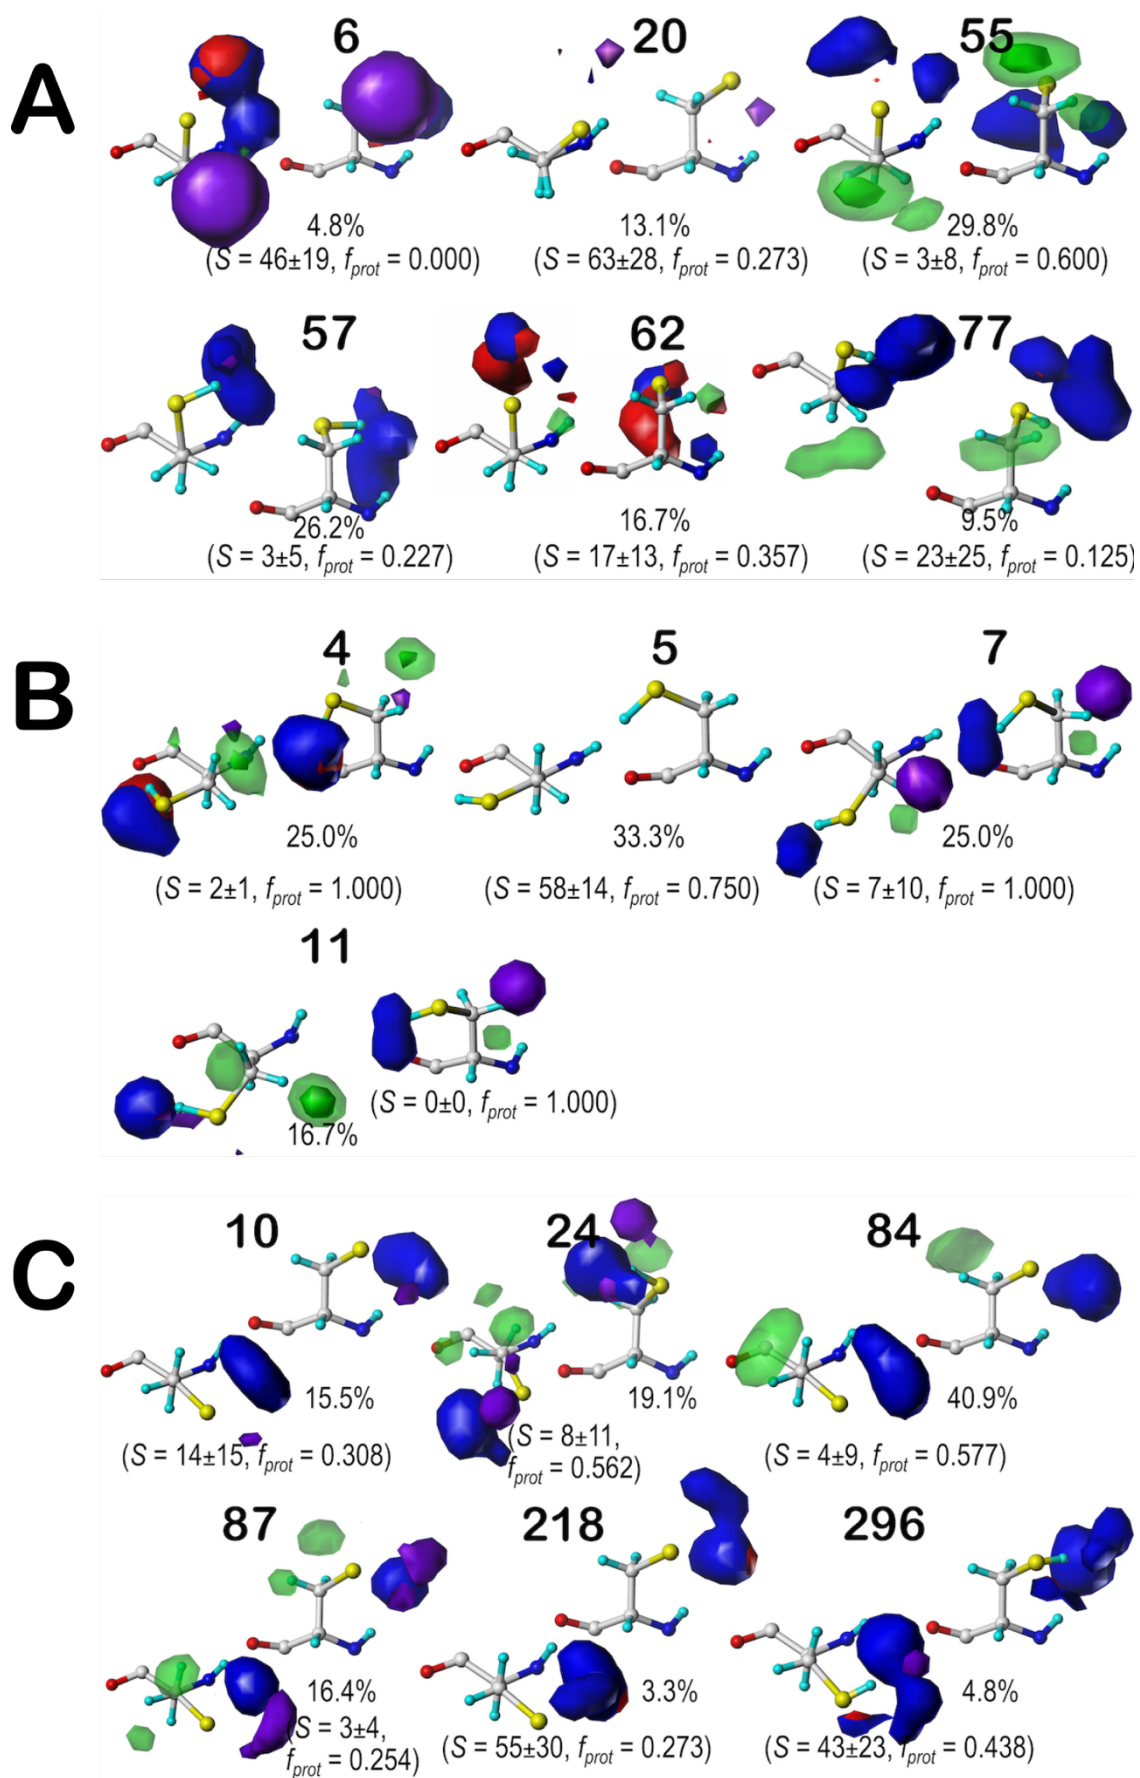

**Figure S4. Hydropathic interaction maps illustrating the Gaussian-weighted average clustered CYS sidechain environments for the c5 chess square. A) 60° parse; B) 180° parse; C) 300° parse. See caption for Figure S1.**

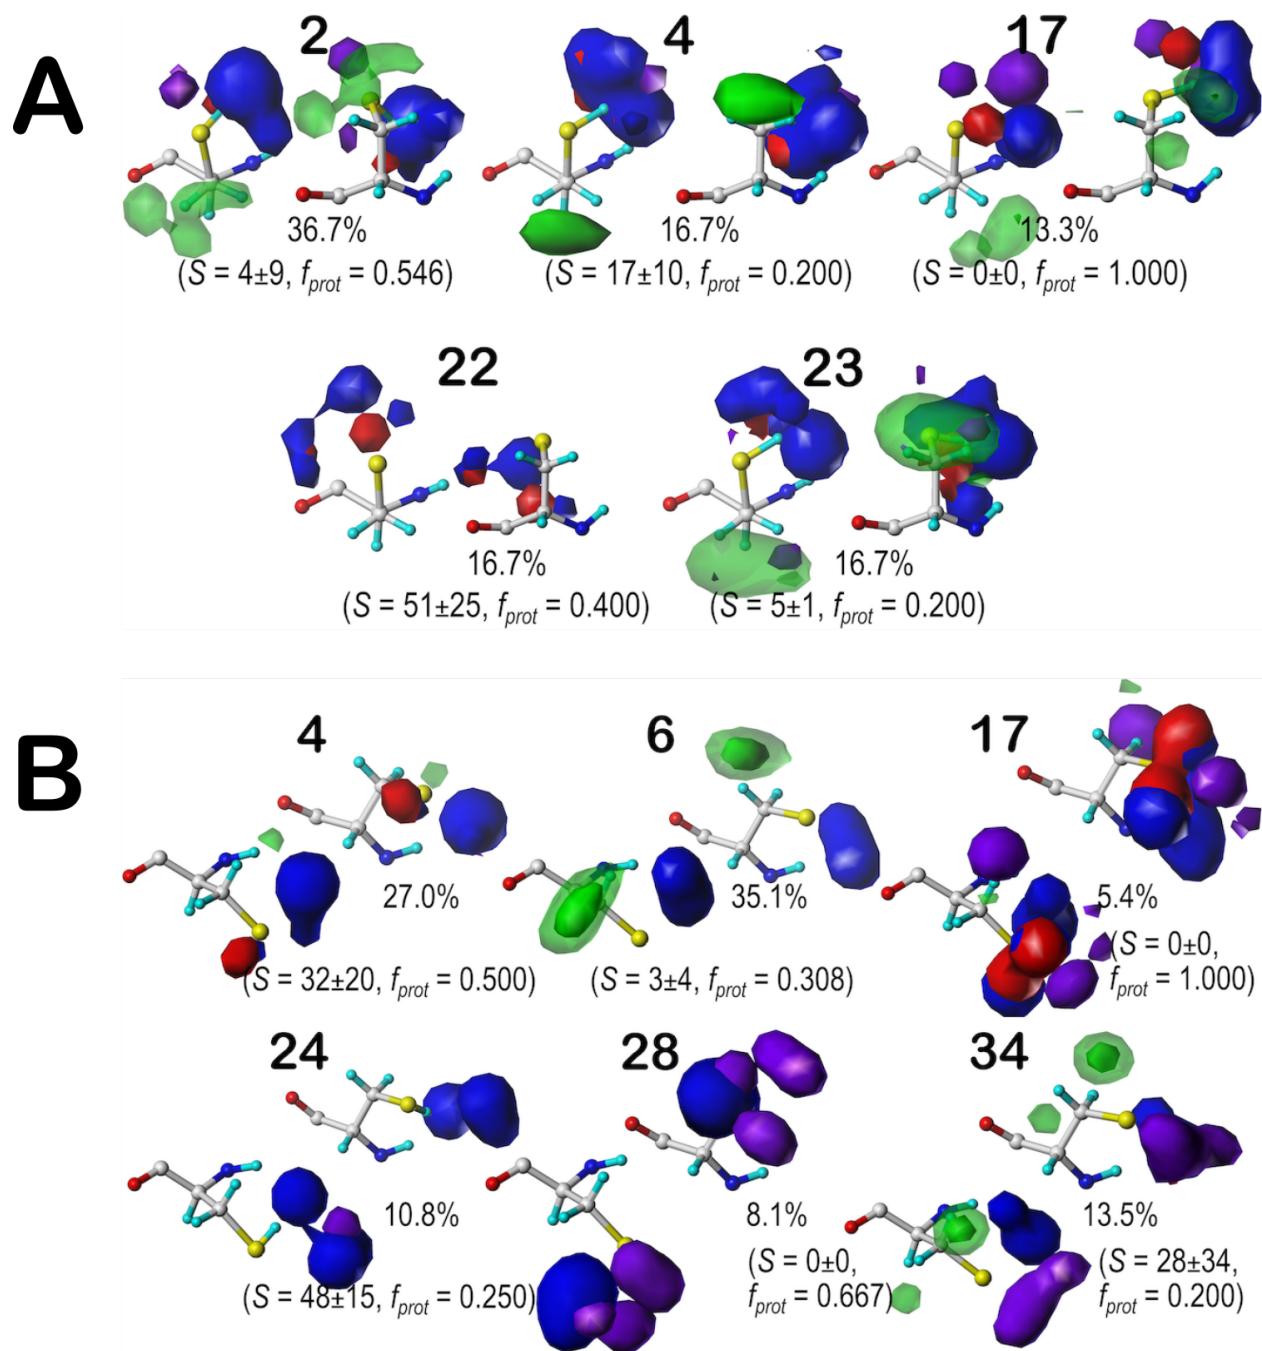

**Figure S5. Hydropathic interaction maps illustrating the Gaussian-weighted average clustered CYS sidechain environments for the *d5* chess square. A) 60° parse; B) 300° parse. See caption for Figure S1.**

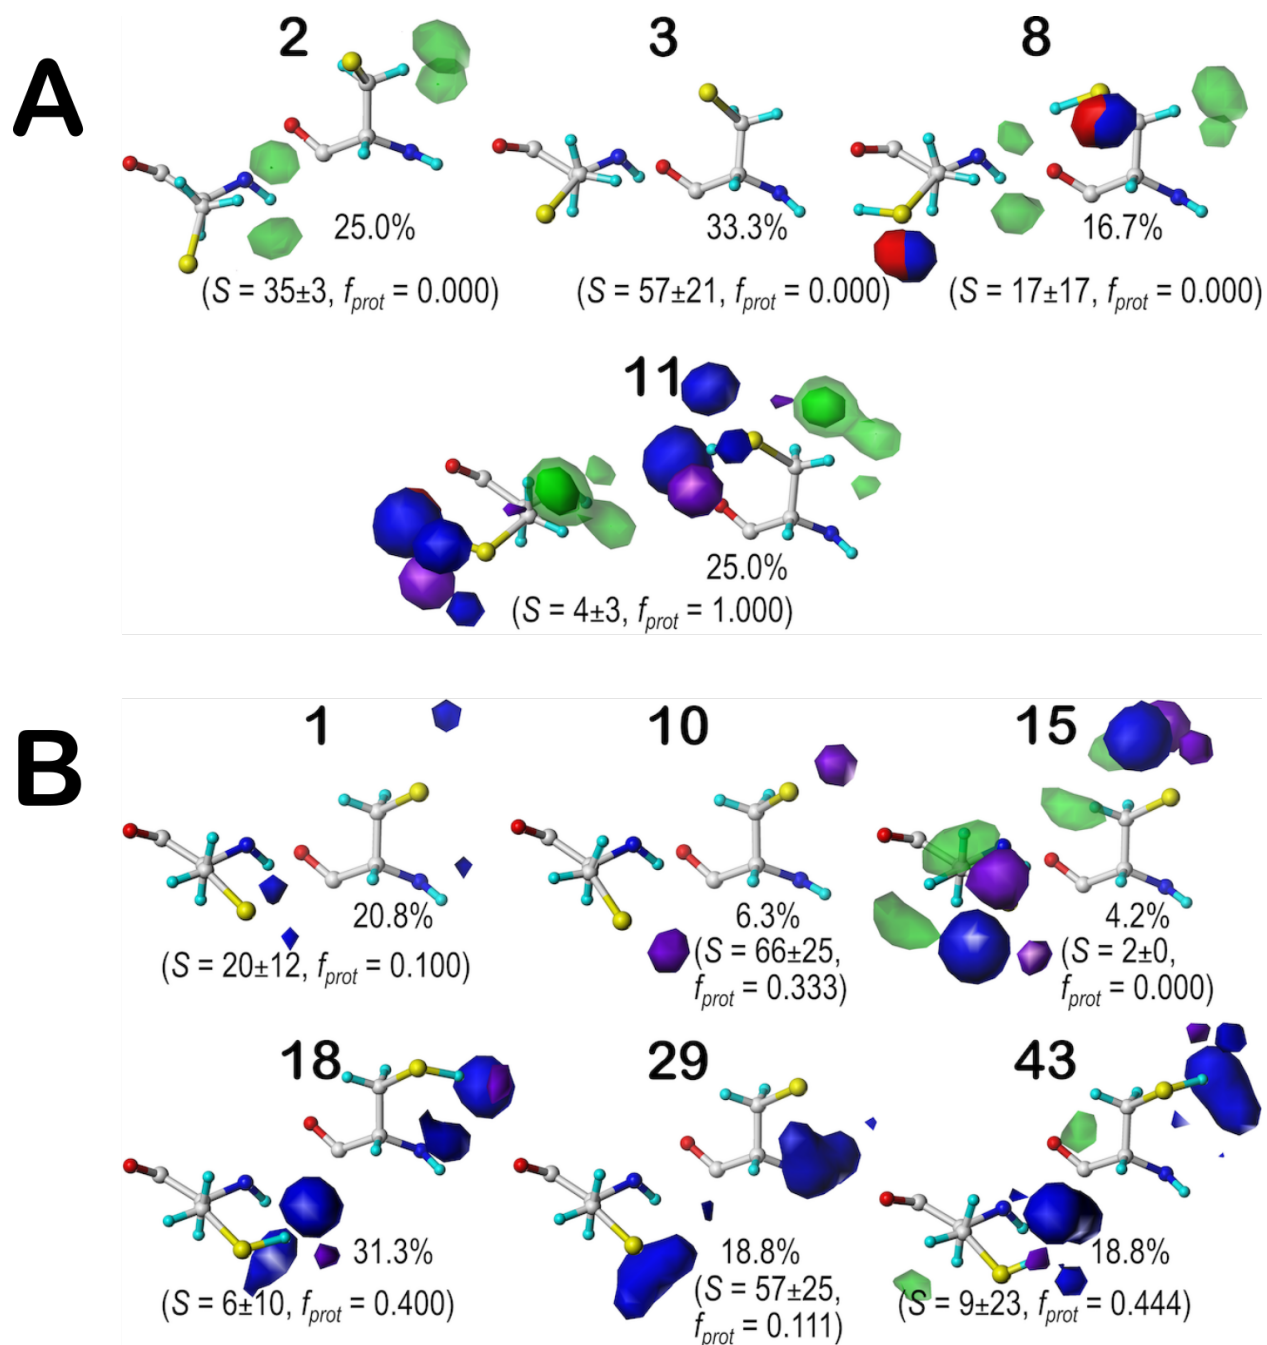

**Figure S6. Hydropathic interaction maps illustrating the Gaussian-weighted average clustered CYS sidechain environments for the *f6* chess square. A) 180° parse; B) 300° parse. See caption for Figure S1.**



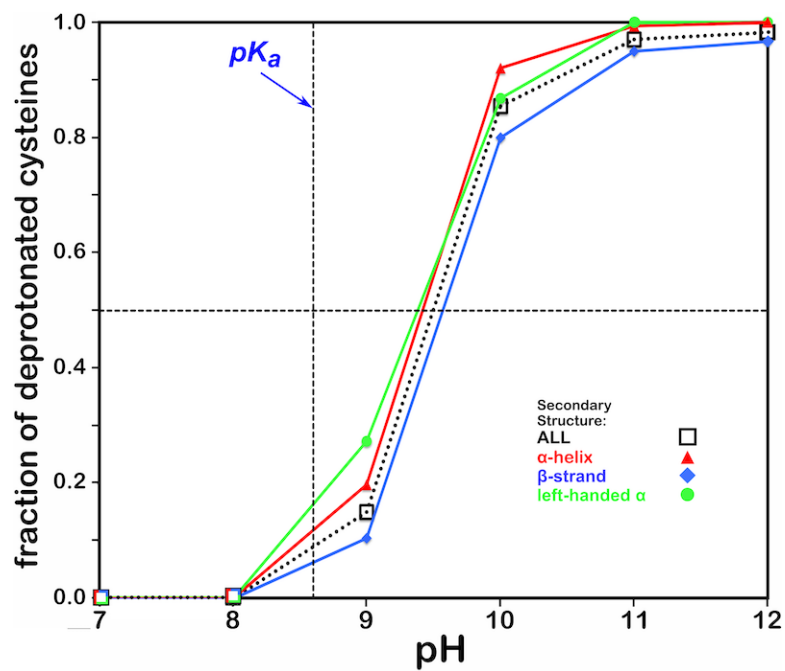

Figure S7. Titration curves of CYZ (cysteine, broken bridge) residue by secondary structure. The native  $pK_a$  for cysteine is indicated.

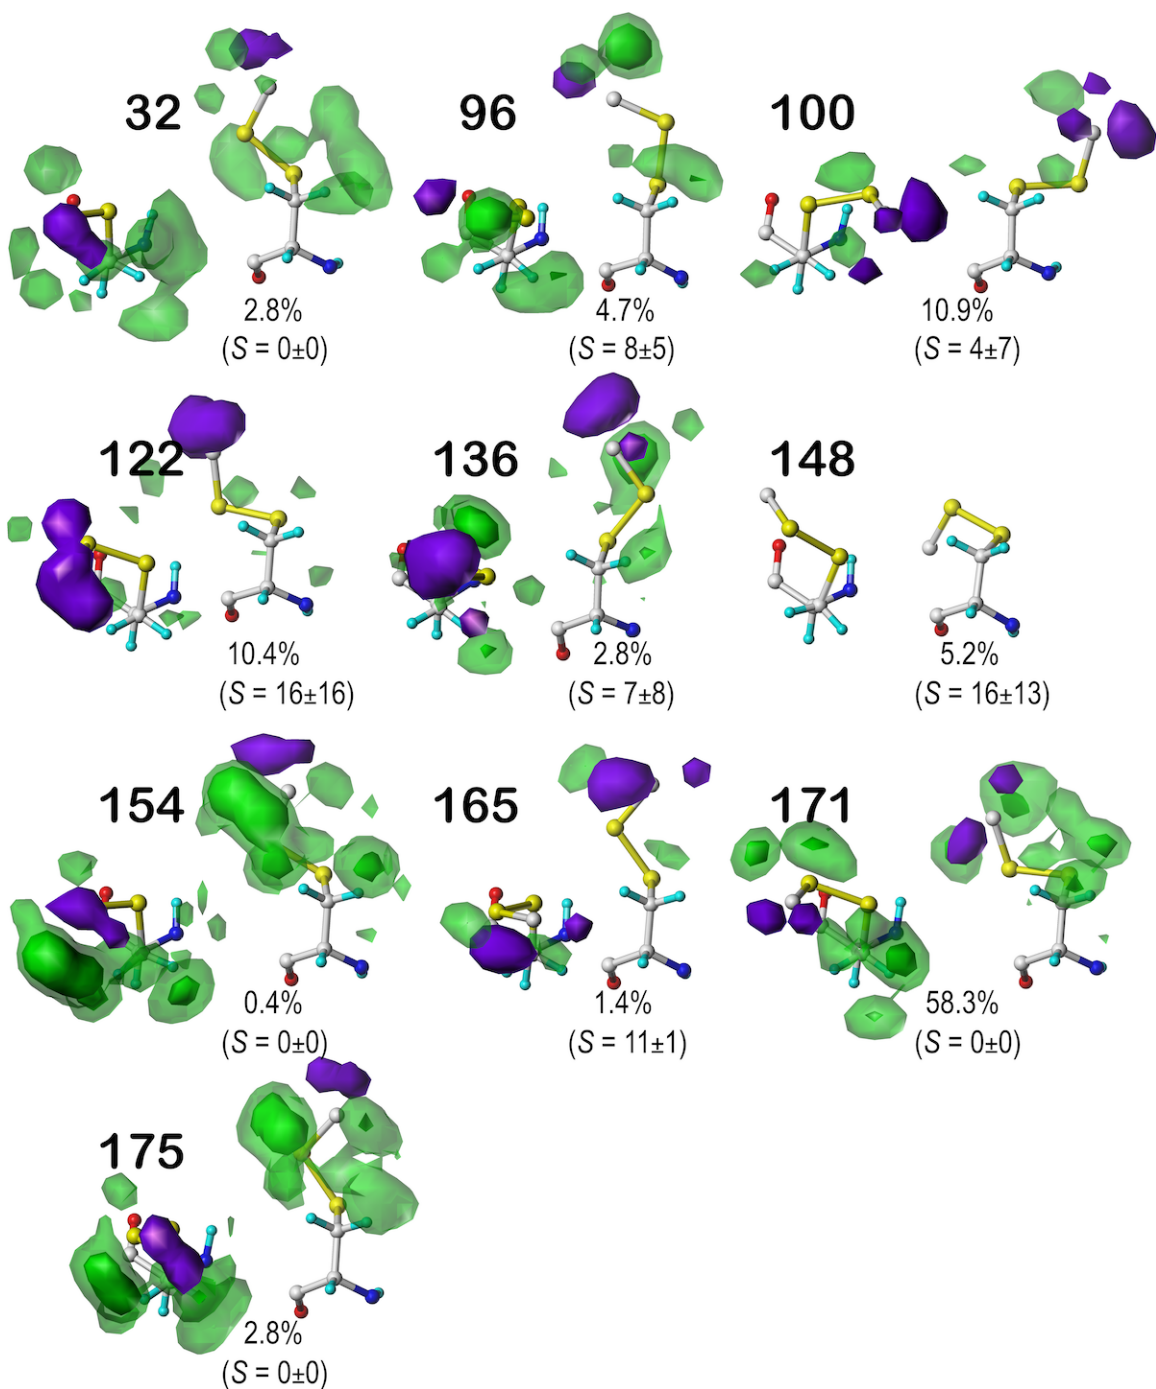

Figure S8. Hydrophobic interaction maps illustrating the Gaussian-weighted average clustered CYX (cysteine, intact bridge) sidechain environments for the *b1.60* chess square/parse. See caption for Figure S1.

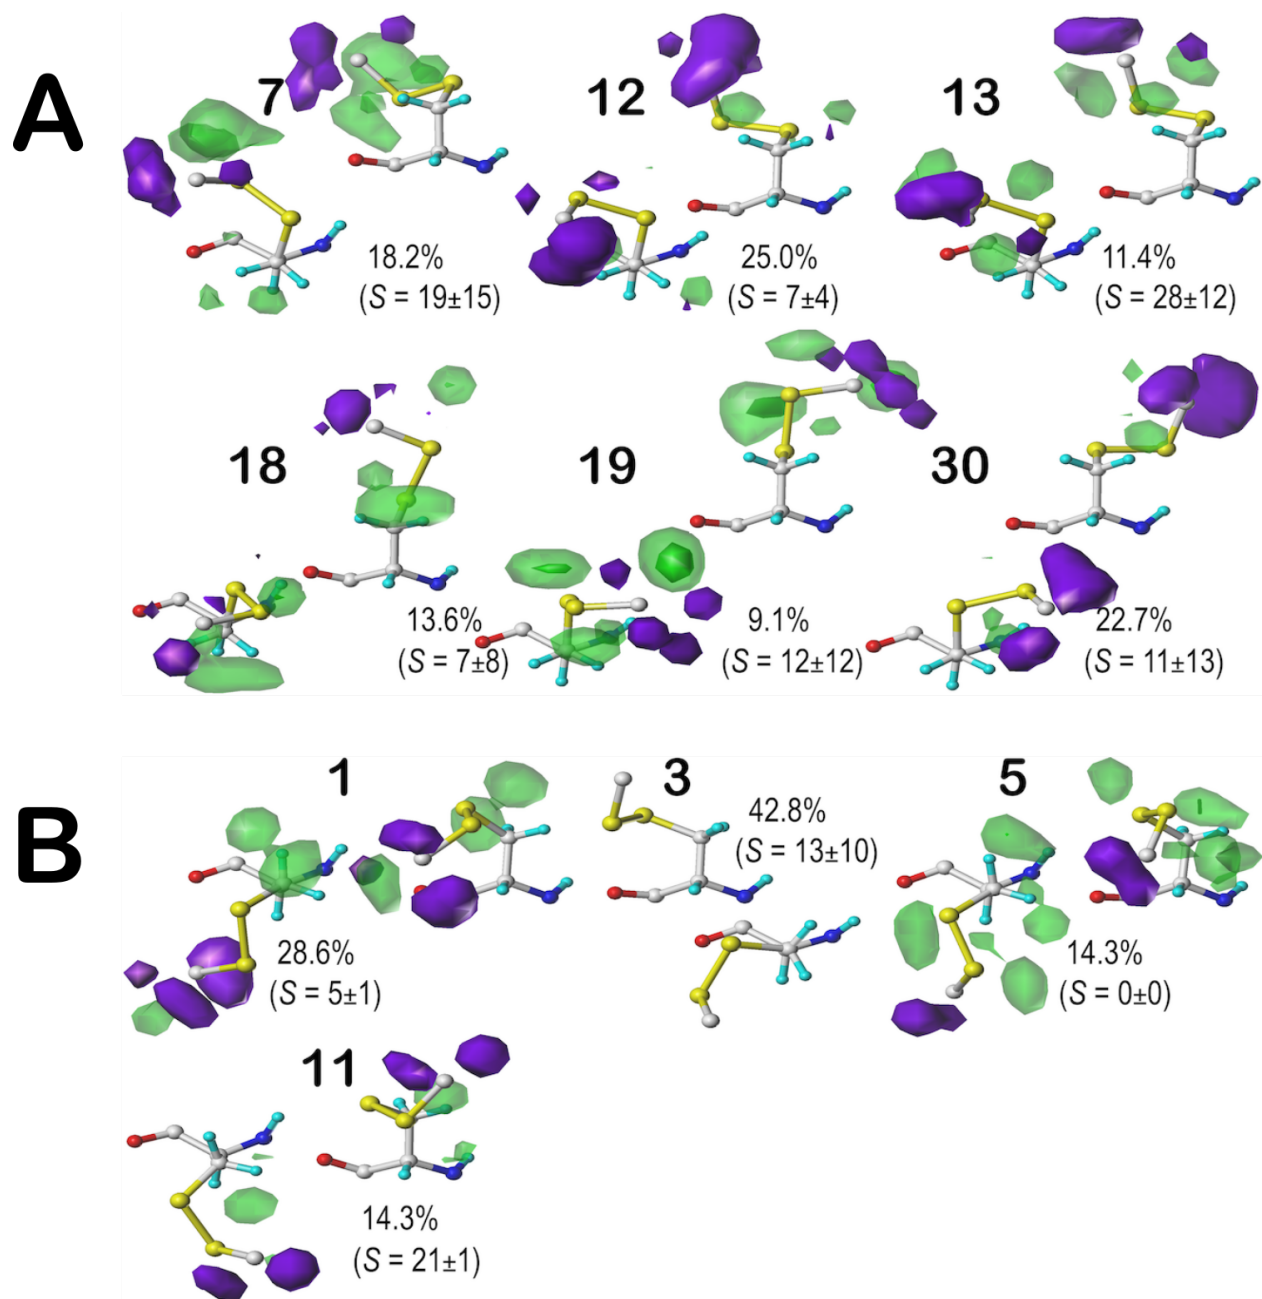

**Figure S9. Hydropathic interaction maps illustrating the Gaussian-weighted average clustered CYX (cysteine, intact bridge) sidechain environments for the c5 chess square. A) 60° parse; B) 180° parse. See caption for Figure S1.**

**C**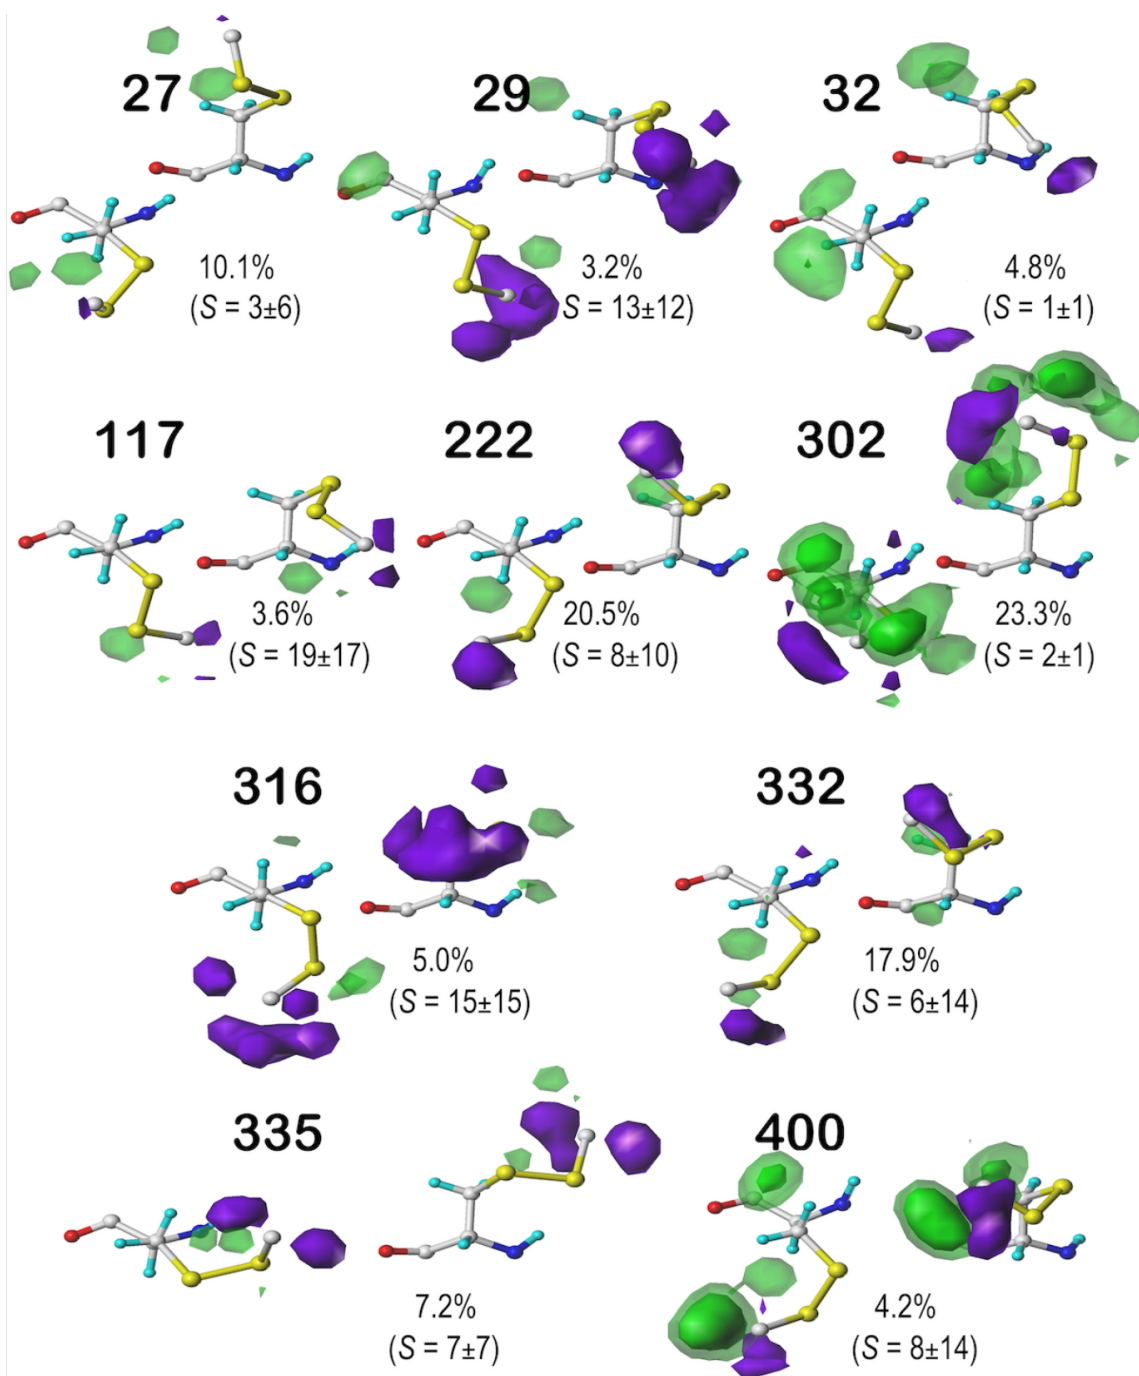

Figure S9 (continued). **C** 300° parse. See caption for Figure S1.

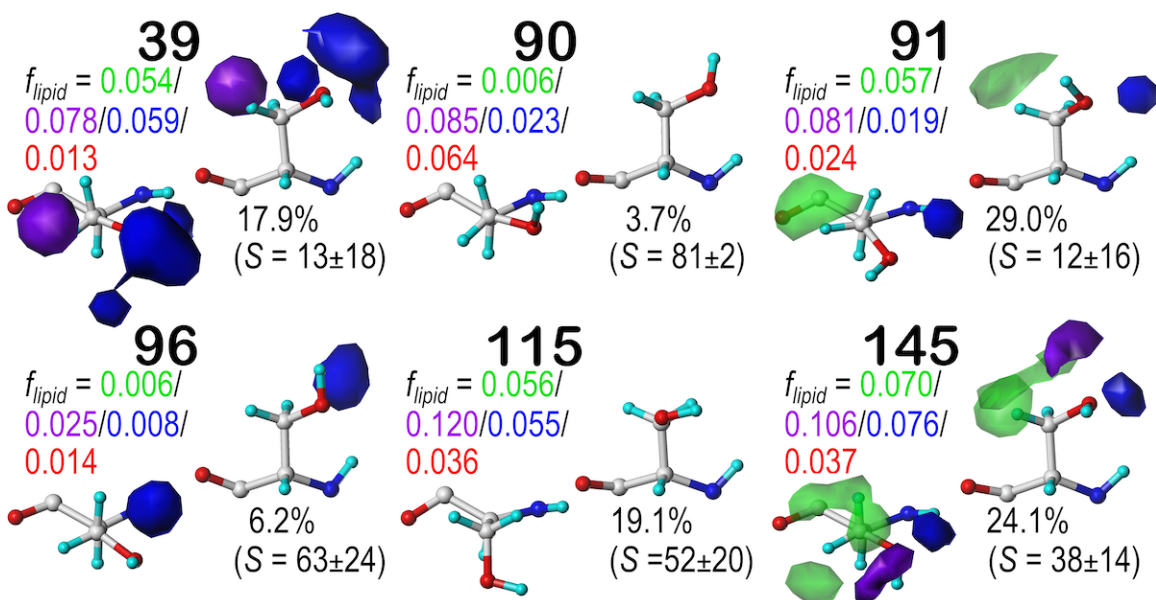

**Figure S10.** Hydrophobic interaction maps illustrating the Gaussian-weighted average clustered SERm (serine, membrane protein) sidechain environments for *d5.300* chess square/parse.  $f_{lipid}$  values are the fraction of all interaction scores arising from residue-to-lipid interactions in the molecular models by type (green-favorable hydrophobic, purple-unfavorable hydrophobic, blue-favorable polar, red-unfavorable polar). See also caption for Figure S1.

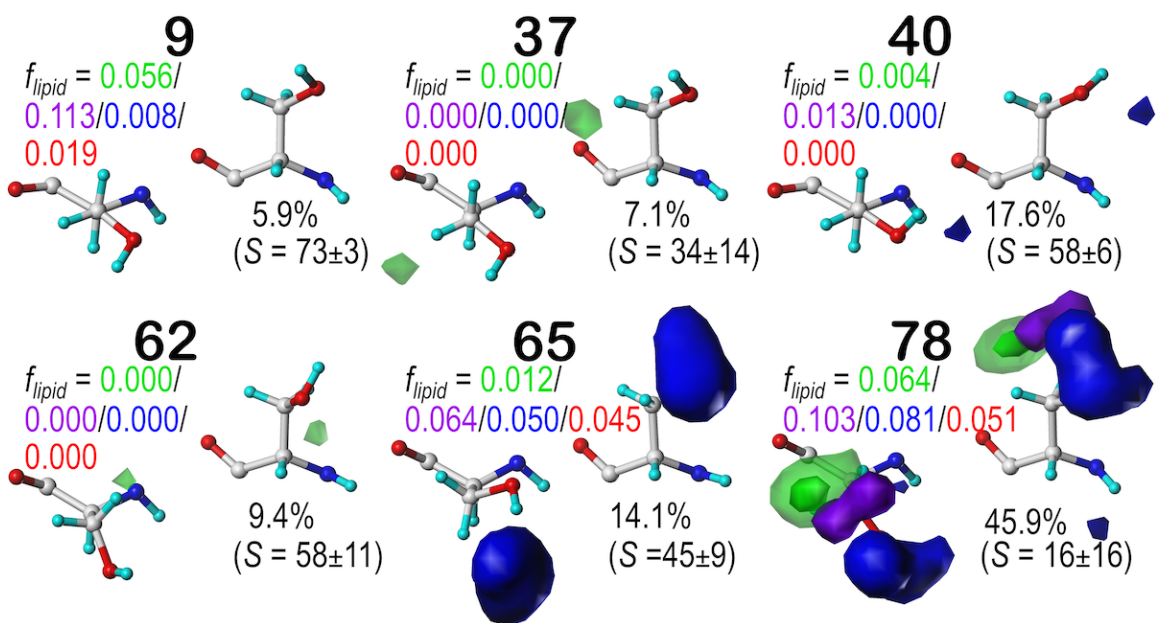

**Figure S11.** Hydrophobic interaction maps illustrating the Gaussian-weighted average clustered SERm (serine, membrane protein) sidechain environments for *f6.300* chess square/parse. See captions for Figures S1 and S10.

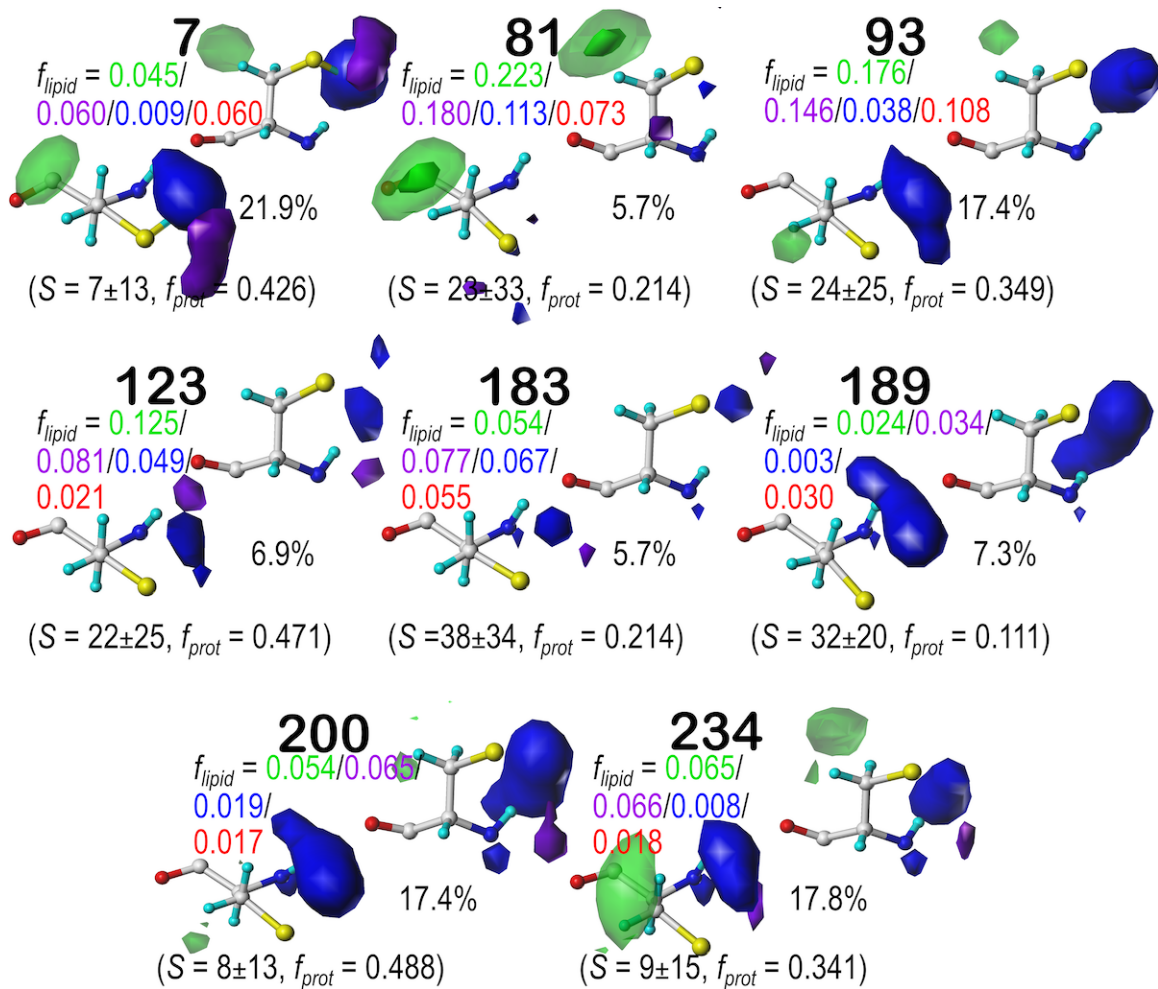

**Figure S12. Hydrophobic interaction maps illustrating the Gaussian-weighted average clustered CYSm (cysteine, membrane protein) sidechain environments for *d5.300* chess square/parse. See captions for Figures S1 and S10.**

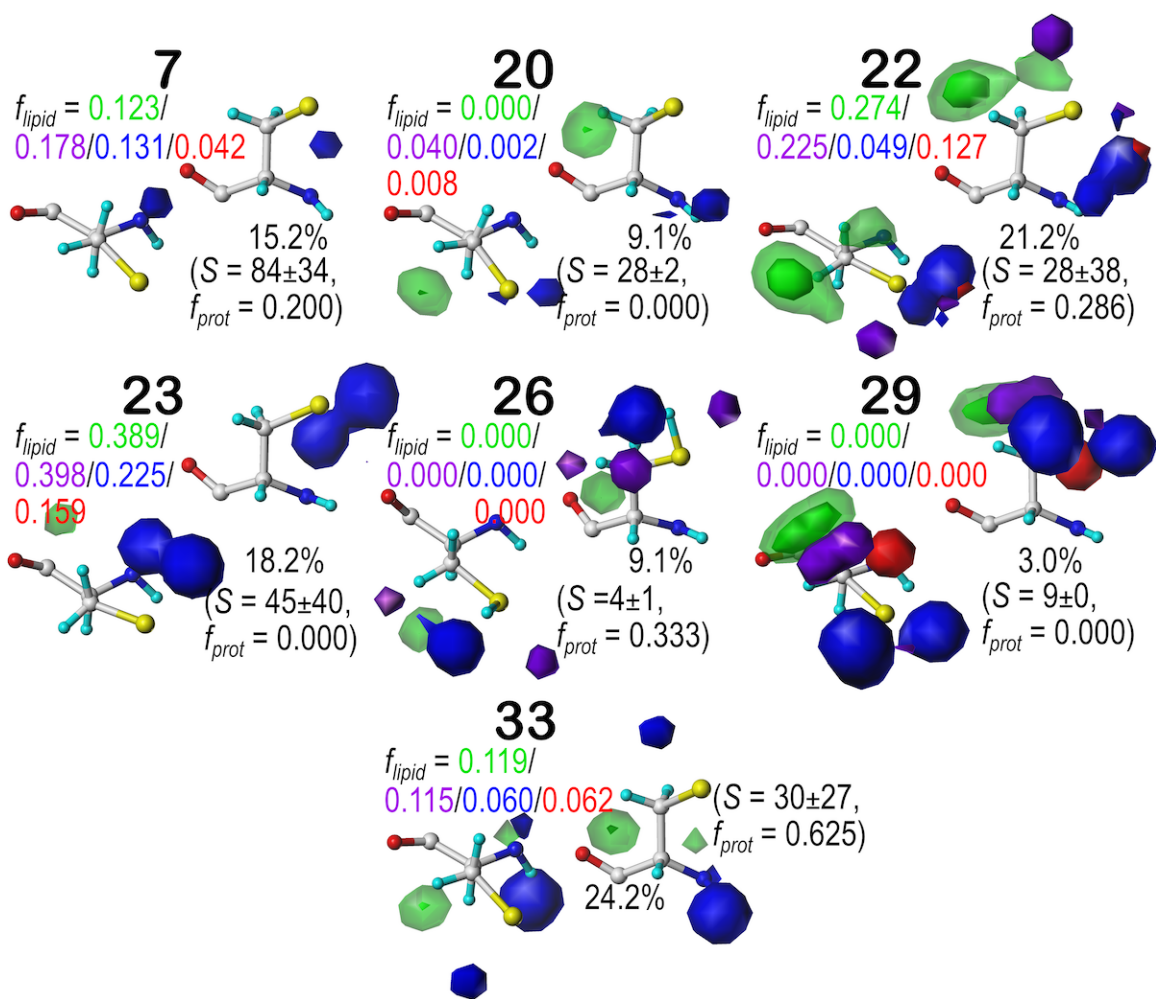

Figure S13. Hydropathic interaction maps illustrating the Gaussian-weighted average clustered CYSm (cysteine, membrane protein) sidechain environments for *f6.300* chess square/parse. See captions for Figures S1 and S10.
